# Supplementary material for: Airborne radionuclides and heavy metals in High Arctic terrestrial environment as the indicators of sources and transfers of contamination
Source: Copernicus journal article supplement (doi:10.5194/tc-2019-34), 2019-03-15
Supplement: Supplementary file [file tc-2019-34-AC2-supplement.pdf]

# **Airborne radionuclides and heavy metals in High Arctic terrestrial environment as the indicators of sources and transfers of contamination**

Edyta Łokas<sup>1</sup>, Agata Zaborska<sup>2</sup>, Ireneusz Sobota<sup>3</sup>, Paweł Gaca<sup>4</sup>, Andrew Milton<sup>4</sup>, Paweł Kocurek<sup>5</sup>, Anna Cwanek<sup>1</sup>

<sup>1</sup>Department of Nuclear Physical Chemistry, Institute of Nuclear Physics Polish Academy of Sciences, Kraków, 31-342, Poland

<sup>2</sup>Marine Chemistry and Biochemistry Department, Institute of Oceanology Polish Academy of Sciences, Sopot, 81-712, Poland

<sup>3</sup>Department of Hydrology and Water Management, Polar Research Centre, Nicholas Copernicus University, Toruń, 87-100, Poland

<sup>4</sup>Ocean and Earth Science, University of Southampton, National Oceanography Centre, European Way, Southampton, SO14 3ZH United Kingdom

<sup>5</sup>Research and Development Laboratory for Aerospace Materials, Rzeszow University of Technology, Rzeszow, 35-959, Poland

*Correspondence to:* Edyta Łokas (Edyta.Lokas@ifj.edu.pl)

**Tab. S1.** Coordinates and selected morphology properties of cryoconite holes on Waldemarbreen.

| N  | GPS coordinates<br>UTM 33N (m) |         | Altitude<br>a.s.l. (m) | Area (cm <sup>2</sup> ) | Depth (cm) |
|----|--------------------------------|---------|------------------------|-------------------------|------------|
| 2  | 435222.3                       | 8735590 | 223                    | 165                     | 29         |
| 3  | 435869.9                       | 8735874 | 308                    | 156                     | 10         |
| 4  | 436175.5                       | 8736001 | 357                    | 476                     | 28         |
| 5  | 435295.8                       | 8735921 | 255                    | 80                      | 9          |
| 6  | 435512.6                       | 8734906 | 201                    | 12.3                    | 1          |
| 7  | 435954.4                       | 8735202 | 233                    | 25                      | 2.5        |
| 8  | 435668.5                       | 8735657 | 264                    | 121                     | 5.5        |
| 9  | 434772.3                       | 8735363 | 165                    | 340                     | 4          |
| 10 | 434772.3                       | 8735363 | 165                    | 380                     | 7          |
| 11 | 435668.5                       | 8735657 | 264                    | 20                      | 8          |
| 12 | 436175.5                       | 8736001 | 357                    | 170                     | 7          |
| 13 | 436858.6                       | 8735885 | 423                    | 1200                    | 16         |

**Tab. S2. Activity concentrations of anthropogenic radionuclides ( $^{137}\text{Cs}$ , Pu isotopes,  $^{241}\text{Am}$ ) expressed in  $\text{Bq kg}^{-1}$  and radionuclide activity ratios and mass ratios in soil profiles. All data were corrected for August 2014, the sampling date.**

| Soil                                             | Depth (cm) | $^{238}\text{Pu}$ (Bq/kg) | $^{239+240}\text{Pu}$ (Bq/kg) | $^{241}\text{Am}$ (Bq/kg) | $^{137}\text{Cs}$ (Bq/kg) | $^{238}\text{Pu}/^{239+240}\text{Pu}$ | $^{241}\text{Am}/^{239+240}\text{Pu}$ | $^{239+240}\text{Pu}/^{137}\text{Cs}$ | $^{238}\text{Pu}$ ( $\text{Bq/m}^2$ ) | $^{239+240}\text{Pu}$ ( $\text{Bq/m}^2$ ) | $^{241}\text{Am}$ ( $\text{Bq/m}^2$ ) | $^{137}\text{Cs}$ ( $\text{Bq/m}^2$ ) | LOI (%) |
|--------------------------------------------------|------------|---------------------------|-------------------------------|---------------------------|---------------------------|---------------------------------------|---------------------------------------|---------------------------------------|---------------------------------------|-------------------------------------------|---------------------------------------|---------------------------------------|---------|
| S1-1                                             | 2          | <0.03                     | <0.03                         | <0.1                      | 31 ± 4                    | -                                     | -                                     | -                                     | -                                     | -                                         | -                                     | 340 ± 41                              | 15      |
| S1-2                                             | 4          | <0.05                     | 1.07 ± 0.08                   | 0.59 ± 0.11               | <5                        | -                                     | 0.55 ± 0.11                           | -                                     | -                                     | 25.7 ± 1.9                                | 14.2 ± 2.6                            | 120 ± 24                              | 8       |
| S1-3                                             | 6          | <0.03                     | 0.08 ± 0.01                   | <0.1                      | <5                        | -                                     | -                                     | -                                     | -                                     | 1.8 ± 0.2                                 | -                                     | 44 ± 22                               | 8       |
| S1-4                                             | 9          | <0.07                     | <0.07                         | <0.03                     | <2                        | -                                     | -                                     | -                                     | -                                     | -                                         | -                                     | -                                     | 9       |
| S1-5                                             | 13         | <0.08                     | <0.08                         | <0.08                     | <2                        | -                                     | -                                     | -                                     | -                                     | -                                         | -                                     | -                                     | 8       |
| <b>Inventory (<math>\text{Bq m}^{-2}</math>)</b> |            |                           |                               |                           |                           |                                       |                                       |                                       | -                                     | <b>28 ± 2</b>                             | <b>14 ± 3</b>                         | <b>500 ± 90</b>                       |         |
| S3-1                                             | 2          | <0.03                     | 0.32 ± 0.03                   | 0.09 ± 0.01               | 8 ± 2                     | -                                     | 0.28 ± 0.04                           | 0.042 ± 0.013                         | -                                     | 6.8 ± 0.6                                 | 1.9 ± 0.2                             | 148 ± 42                              | 8       |
| S3-2                                             | 4.5        | <0.03                     | <0.03                         | <0.03                     | <4                        | -                                     | -                                     | -                                     | -                                     | -                                         | -                                     | -                                     | 9       |
| S3-3                                             | 8          | <0.03                     | <0.03                         | <0.03                     | <5                        | -                                     | -                                     | -                                     | -                                     | -                                         | -                                     | -                                     | 8       |
| S3-4                                             | 12.5       | <0.03                     | <0.03                         | <0.03                     | <5                        | -                                     | -                                     | -                                     | -                                     | -                                         | -                                     | -                                     | 10      |
| <b>Inventory (<math>\text{Bq m}^{-2}</math>)</b> |            |                           |                               |                           |                           |                                       |                                       |                                       | -                                     | <b>6.8 ± 0.6</b>                          | <b>1.9 ± 0.2</b>                      | <b>150 ± 40</b>                       |         |
| S4-1                                             | 1          | 0.08 ± 0.01               | 2.13 ± 0.16                   | 0.90 ± 0.06               | 63 ± 7                    | 0.038 ± 0.005                         | 0.39 ± 0.03                           | 0.034 ± 0.004                         | 0.58 ± 0.1                            | 15.6 ± 1.2                                | 6.1 ± 0.2                             | 475 ± 51                              | 7       |
| S4-2                                             | 4          | <0.04                     | 0.56 ± 0.04                   | 0.30 ± 0.03               | 16 ± 7                    | -                                     | 0.48 ± 0.06                           | 0.034 ± 0.006                         | 0.35 ± 0.1                            | 5.0 ± 0.4                                 | 2.4 ± 0.3                             | 150 ± 27                              | 8       |
| S4-3                                             | 8          | <0.02                     | 0.08 ± 0.01                   | <0.03                     | 2 ± 1                     | -                                     | -                                     | 0.041 ± 0.021                         | -                                     | 1.9 ± 0.2                                 | -                                     | 47 ± 24                               | 9       |
| S4-4                                             | 12         | <0.03                     | <0.03                         | <0.03                     | <4                        | -                                     | -                                     | -                                     | -                                     | -                                         | -                                     | -                                     | 9       |
| <b>Inventory (<math>\text{Bq m}^{-2}</math>)</b> |            |                           |                               |                           |                           |                                       |                                       |                                       | <b>0.94 ± 0.2</b>                     | <b>22 ± 2</b>                             | <b>9 ± 1</b>                          | <b>670 ± 100</b>                      |         |
| S5-1                                             | 2          | <0.04                     | 0.51 ± 0.04                   | 0.25 ± 0.03               | 9 ± 1                     | -                                     | 0.49 ± 0.07                           | 0.059 ± 0.009                         | -                                     | 15.6 ± 1.1                                | 5.0 ± 0.6                             | 238 ± 20                              | 8       |
| S5-2                                             | 4          | 0.03 ± 0.01               | 1.04 ± 0.08                   | 0.47 ± 0.06               | 18 ± 1                    | 0.029 ± 0.010                         | 0.45 ± 0.07                           | 0.056 ± 0.005                         | 1.2 ± 0.4                             | 5.0 ± 0.4                                 | 18.6 ± 2.4                            | 174 ± 15                              | 9       |
| S5-3                                             | 7          | <0.03                     | <0.03                         | <0.06                     | <2                        | -                                     | -                                     | -                                     | -                                     | 1.9 ± 0.2                                 | -                                     | -                                     | 8       |
| S5-4                                             | 12         | <0.02                     | <0.02                         | <0.02                     | <2                        | -                                     | -                                     | -                                     | -                                     | -                                         | -                                     | -                                     | 9       |
| <b>Inventory (<math>\text{Bq m}^{-2}</math>)</b> |            |                           |                               |                           |                           |                                       |                                       |                                       | <b>1.2 ± 0.4</b>                      | <b>22 ± 2</b>                             | <b>24 ± 3</b>                         | <b>400 ± 30</b>                       |         |
| S6-1                                             | 2          | 0.03 ± 0.01               | 0.58 ± 0.05                   | 0.28 ± 0.03               | 23 ± 1                    | 0.052 ± 0.018                         | 0.045 ± 0.05                          | 0.025 ± 0.003                         | -                                     | 15.3 ± 1.3                                | 6.9 ± 0.6                             | 449 ± 26                              | 8       |
| S6-2                                             | 5          | <0.03                     | <0.03                         | <0.03                     | <2                        | -                                     | -                                     | -                                     | -                                     | -                                         | -                                     | -                                     | 9       |
| S6-3                                             | 10         | <0.02                     | <0.02                         | <0.03                     | <2                        | -                                     | -                                     | -                                     | -                                     | -                                         | -                                     | -                                     | 9       |
| S6-4                                             | 17         | <0.06                     | <0.06                         | <0.03                     | <3                        | -                                     | -                                     | -                                     | -                                     | -                                         | -                                     | -                                     | 8       |
| <b>Inventory (<math>\text{Bq m}^{-2}</math>)</b> |            |                           |                               |                           |                           |                                       |                                       |                                       | -                                     | <b>15 ± 1</b>                             | <b>7 ± 1</b>                          | <b>450 ± 30</b>                       |         |

**Tab. S3. Activity concentrations of natural radionuclides ( $^{210}\text{Pb}$ ,  $^{234,238}\text{U}$ ,  $^{230,232}\text{Th}$ ) expressed in  $\text{Bq kg}^{-1}$  and activity ratio of  $^{234}\text{U}/^{238}\text{U}$  in soil profiles. Data for  $^{210}\text{Pb}$  were corrected for August 2014, the sampling date.**

| soil | Depth (cm) | $^{210}\text{Pb}$<br>(Bq/kg) | $^{234}\text{U}$<br>(Bq/kg) | $^{238}\text{U}$<br>(Bq/kg) | $^{234}\text{U}/^{238}\text{U}$ | $^{230}\text{Th}$<br>(Bq/kg) | $^{232}\text{Th}$<br>(Bq/kg) |
|------|------------|------------------------------|-----------------------------|-----------------------------|---------------------------------|------------------------------|------------------------------|
| S1-1 | 2          | 65±2                         | 23±2                        | 22±2                        | 1.0±0.1                         | 17±1                         | 32±3                         |
| S1-2 | 4          | 43±1                         | 21±1                        | 22±2                        | 0.9±0.1                         | 22±2                         | 42±3                         |
| S1-3 | 6          | 15±1                         | 22±2                        | 23±2                        | 1.0±0.1                         | 9±1                          | 8±1                          |
| S1-4 | 9          | 17±1                         | 21±1                        | 22±1                        | 1.0±0.1                         | 12±2                         | 14±2                         |
| S1-5 | 13         | 15±1                         | 21±1                        | 22±1                        | 1.0±0.1                         | -                            | -                            |
| S3-1 | 2          | 37±5                         | 16±1                        | 16±1                        | 1.0±0.1                         | 9±1                          | 17±2                         |
| S3-2 | 4.5        | 15±4                         | 16±1                        | 15±1                        | 1.1±0.1                         | 10±1                         | 18±2                         |
| S3-3 | 8          | 17±4                         | 15±1                        | 14±1                        | 1.0±0.1                         | 11±1                         | 20±2                         |
| S3-4 | 12.5       | 16±4                         | 17±1                        | 14±1                        | 1.2±0.1                         | 10±1                         | 19±1                         |
| S4-1 | 1          | 173±4                        | 21±1                        | 20±1                        | 1.1±0.1                         | 10±1                         | 21±2                         |
| S4-2 | 4          | 31±1                         | 20±1                        | 18±1                        | 1.1±0.2                         | 10±1                         | 27±2                         |
| S4-3 | 8          | 29±2                         | 19±1                        | 18±1                        | 1.1±0.1                         | 11±1                         | 29±2                         |
| S4-4 | 12         | 27±3                         | 21±1                        | 20±1                        | 1.0±0.1                         | 10±1                         | 29±2                         |
| S5-1 | 2          | 83±7                         | 23±2                        | 21±1                        | 1.1±0.1                         | 11±1                         | 19±1                         |
| S5-2 | 4          | 57±8                         | 28±2                        | 30±2                        | 0.9±0.1                         | 15±1                         | 34±3                         |
| S5-3 | 7          | 21±2                         | 17±1                        | 17±1                        | 1.0±0.1                         | 10±1                         | 15±1                         |
| S5-4 | 12         | 18±2                         | 15±1                        | 16±1                        | 1.0±0.1                         | 10±1                         | 20±2                         |
| S6-1 | 2          | 82±6                         | 24±2                        | 22±2                        | 1.1±0.1                         | 11±1                         | 16±1                         |
| S6-2 | 5          | 21±4                         | 14±1                        | 13±1                        | 1.0±0.1                         | 10±1                         | 17±1                         |
| S6-3 | 10         | 18±2                         | 19±1                        | 19±1                        | 1.0±0.1                         | 10±1                         | 21±2                         |
| S6-4 | 17         | 19±2                         | 13±1                        | 12±1                        | 1.1±0.1                         | 9±1                          | 13±1                         |

**Tab. S4. Activity concentrations of anthropogenic radionuclides ( $^{137}\text{Cs}$ , Pu isotopes,  $^{241}\text{Am}$ ) expressed in  $\text{Bq kg}^{-1}$  and radionuclide activity ratios and mass ratios in all cryoconite samples. All data were corrected for August 2014, the sampling date.**

| No.         | $^{137}\text{Cs}$<br>(Bq/kg) | $^{239+240}\text{Pu}$<br>(Bq/kg) | $^{238}\text{Pu}$<br>(Bq/kg) | $^{241}\text{Am}$<br>(Bq/kg) | $^{238}\text{Pu}/^{239+240}\text{Pu}$ | $^{239+240}\text{Pu}/^{137}\text{Cs}$ | $^{241}\text{Am}/^{239+240}\text{Pu}$ | $^{240}\text{Pu}/^{239}\text{Pu}$ |
|-------------|------------------------------|----------------------------------|------------------------------|------------------------------|---------------------------------------|---------------------------------------|---------------------------------------|-----------------------------------|
| <b>KW2</b>  | 642 ± 84                     | 16.73 ± 1.12                     | 0.80 ± 0.10                  | 7.56 ± 0.54                  | 0.048±0.007                           | 0.026±0.004                           | 0.45±0.04                             | 0.159±0.002                       |
| <b>KW3</b>  | 1021 ± 136                   | 16.93 ± 1.15                     | 0.59 ± 0.08                  | 7.52 ± 0.57                  | 0.035±0.005                           | 0.017±0.002                           | 0.44± 0.05                            | 0.145±0.001                       |
| <b>KW4</b>  | 2030 ± 257                   | 33.54 ± 2.30                     | 2.09 ± 0.22                  | 18.77 ± 1.27                 | 0.062±0.008                           | 0.017±0.002                           | 0.56±0.05                             | 0.141±0.001                       |
| <b>KW5</b>  | 109 ± 22                     | 1.59 ± 0.16                      | 0.08 ± 0.02                  | 1.04 ± 0.16                  | 0.050±0.013                           | 0.015±0.003                           | 0.65±0.12                             | 0.196±0.019                       |
| <b>KW6</b>  | <3                           | 0.09 ± 0.02                      | <0.03                        | <0.25                        | -                                     | -                                     | -                                     | -                                 |
| <b>KW7</b>  | 17 ± 7                       | 0.12 ± 0.02                      | <0.02                        | <0.20                        | -                                     | 0.007±0.003                           | -                                     | -                                 |
| <b>KW8</b>  | 440 ± 58                     | 7.20 ± 0.57                      | 0.45 ± 0.07                  | 3.02 ± 0.26                  | 0.063±0.011                           | 0.016±0.003                           | 0.42±0.05                             | 0.161±0.004                       |
| <b>KW9</b>  | 13 ± 3                       | 0.47 ± 0.07                      | <0.04                        | 0.25 ± 0.06                  | -                                     | 0.035±0.010                           | 0.53±0.16                             | 0.121±0.039                       |
| <b>KW10</b> | 76 ± 13                      | 2.88 ± 0.27                      | 0.15 ± 0.06                  | 1.45 ± 0.20                  | 0.052±0.022                           | 0.038±0.008                           | 0.50±0.08                             | 0.131±0.015                       |
| <b>KW11</b> | 513 ± 88                     | 7.40 ± 0.54                      | 0.23 ± 0.04                  | 1.80 ± 0.36                  | 0.031±0.006                           | 0.014±0.003                           | 0.24±0.05                             | 0.137±0.004                       |
| <b>KW12</b> | 1886 ± 264                   | 33.64 ± 2.33                     | 2.08 ± 0.23                  | 18.13 ± 1.24                 | 0.062±0.008                           | 0.018±0.003                           | 0.54±0.05                             | 0.140±0.001                       |
| <b>KW13</b> | 1905 ± 266                   | 42.77 ± 2.81                     | 2.10 ± 0.20                  | 24.48 ± 1.47                 | 0.049±0.006                           | 0.022±0.003                           | 0.57±0.05                             | 0.143±0.001                       |

**Tab. S5. Activity concentrations of natural radionuclides ( $^{210}\text{Pb}$ ,  $^{234,238}\text{U}$ ,  $^{230,232}\text{Th}$ ) expressed in  $\text{Bq kg}^{-1}$  and activity ratio of  $^{234}\text{U}/^{238}\text{U}$  in all cryoconite samples. Data for  $^{210}\text{Pb}$  were corrected for August 2014, the sampling date.**

| No.         | $^{210}\text{Pb}$<br>(Bq/kg) | $^{234}\text{U}$<br>(Bq/kg) | $^{238}\text{U}$<br>(Bq/kg) | $^{234}\text{U}/^{238}\text{U}$ | $^{230}\text{Th}$<br>(Bq/kg) | $^{232}\text{Th}$<br>(Bq/kg) | LOI (%) |
|-------------|------------------------------|-----------------------------|-----------------------------|---------------------------------|------------------------------|------------------------------|---------|
| <b>KW2</b>  | 3577±196                     | 18±2                        | 18±2                        | 1.0±0.2                         | 18±1                         | 16±1                         | 6       |
| <b>KW3</b>  | 4460± 230                    | 43±4                        | 37±4                        | 1.2±0.2                         | 54±4                         | 50±4                         | 6       |
| <b>KW4</b>  | 12269±634                    | 34±3                        | 36±4                        | 0.9±0.1                         | 45±3                         | 48±4                         | 11      |
| <b>KW5</b>  | 1028±73                      | 25±2                        | 25±3                        | 1.0±0.1                         | 33±2                         | 57±4                         | 2       |
| <b>KW6</b>  | 485±56                       | 16±2                        | 12±2                        | 1.4±0.3                         | 25±2                         | 56±4                         | 3       |
| <b>KW7</b>  | 497±35                       | 12±1                        | 10±1                        | 1.2±0.2                         | 16±1                         | 35±3                         | 3       |
| <b>KW8</b>  | 4443±224                     | 22±2                        | 23±2                        | 1.0±0.1                         | 27±2                         | 51±4                         | 8       |
| <b>KW9</b>  | 1744±95                      | 26±2                        | 24±2                        | 1.1±0.1                         | 27±2                         | 58±4                         | 6       |
| <b>KW10</b> | 2739±142                     | 20±2                        | 20±2                        | 1.0±0.1                         | 27±2                         | 54±4                         | 7       |

|             |          |      |      |         |      |      |    |
|-------------|----------|------|------|---------|------|------|----|
| <b>KW11</b> | 5053±292 | 23±2 | 24±2 | 1.0±0.1 | 34±2 | 50±4 | 8  |
| <b>KW12</b> | 5081±259 | 39±3 | 31±3 | 1.3±0.2 | 47±4 | 47±4 | 11 |
| <b>KW13</b> | 5236±263 | 36±3 | 33±2 | 1.1±0.1 | 41±3 | 48±4 | 11 |

**Table S6. Concentrations of measured metals in soil samples, together with  $^{206}\text{Pb}/^{207}\text{Pb}$  and  $^{208}\text{Pb}/^{206}\text{Pb}$  ratios. The calculated anthropogenic metal enrichment factors (EF) results are also given after normalization for Fe and Al content ( $\text{Fe}_{\text{norm}}$  or  $\text{Al}_{\text{norm}}$ ).**

|              | Pb<br>(mg/kg) | Zn<br>(mg/kg) | Cu<br>(mg/kg) | Cd<br>(mg/kg) | Fe<br>(g/kg) | Al<br>(g/kg) | Cr<br>(mg/kg) | Co<br>(mg/kg) | Ni<br>(mg/kg) | Mn<br>(mg/kg) | $^{206}\text{Pb}/^{207}\text{Pb}$ | $^{208}\text{Pb}/^{206}\text{Pb}$ | EF Pb<br><small>Fe norm</small> | EF Pb<br><small>Al norm</small> | EF Zn<br><small>Fe norm</small> | EF Zn<br><small>Al norm</small> | EF Cu<br><small>Fe norm</small> | EF Cu<br><small>Al norm</small> | EF Cd<br><small>Fe norm</small> | EF Cd<br><small>Al norm</small> |
|--------------|---------------|---------------|---------------|---------------|--------------|--------------|---------------|---------------|---------------|---------------|-----------------------------------|-----------------------------------|---------------------------------|---------------------------------|---------------------------------|---------------------------------|---------------------------------|---------------------------------|---------------------------------|---------------------------------|
| <b>SO1-1</b> | 20.75         | 66.56         | 22.93         | 0.12          | 38.02        | 51.79        | 55.26         | 11.12         | 30.25         | 0.67          | 1.205                             | 2.046                             | 1.6                             | 1.3                             | 1.0                             | 0.9                             | 1.4                             | 1.2                             | 1.1                             | 0.7                             |
| <b>SO1-2</b> | 21.13         | 75.26         | 26.57         | 0.05          | 42.91        | 64.47        | 61.20         | 12.37         | 32.22         | 0.83          | 1.205                             | 2.035                             | 1.4                             | 1.1                             | 1.0                             | 0.8                             | 1.4                             | 1.1                             | 0.4                             | 0.4                             |
| <b>SO1-3</b> | 20.94         | 71.30         | 25.95         | 0.09          | 44.18        | 62.30        | 52.20         | 12.46         | 30.63         | 0.78          | 1.205                             | 2.036                             | 1.4                             | 1.1                             | 0.9                             | 0.8                             | 1.4                             | 1.1                             | 0.7                             | 0.4                             |
| <b>SO1-4</b> | 19.19         | 65.67         | 23.88         | 0.60          | 39.95        | 58.99        | 53.61         | 11.74         | 28.16         | 0.87          | 1.203                             | 2.048                             | 1.4                             | 1.1                             | 1.0                             | 0.7                             | 1.4                             | 1.1                             | 5.3                             | 3.1                             |
| <b>SO1-5</b> | 18.92         | 66.04         | 24.55         | 0.07          | 39.72        | 62.58        | 50.27         | 11.60         | 28.61         | 0.72          | 1.208                             | 2.036                             | 1.4                             | 1.0                             | 1.0                             | 0.7                             | 1.4                             | 1.0                             | 0.6                             | 0.4                             |
| <b>SO5-1</b> | 14.73         | 58.41         | 16.90         | 0.10          | 26.18        | 47.41        | 33.24         | 8.86          | 60.27         | 0.49          | 1.206                             | 2.036                             | 1.6                             | 1.0                             | 1.3                             | 0.8                             | 1.5                             | 1.0                             | 1.3                             | 0.6                             |
| <b>SO5-2</b> | 16.67         | 49.83         | 16.50         | 0.08          | 26.61        | 49.60        | 43.43         | 8.76          | 21.46         | 0.45          | 1.196                             | 2.019                             | 1.8                             | 1.1                             | 1.1                             | 0.7                             | 1.4                             | 0.9                             | 1.0                             | 0.5                             |
| <b>SO5-3</b> | 9.59          | 45.80         | 12.24         | 0.27          | 27.46        | 37.19        | 28.85         | 6.13          | 18.70         | 0.39          | 1.211                             | 2.039                             | 1.0                             | 0.9                             | 1.0                             | 0.8                             | 1.0                             | 0.9                             | 3.4                             | 2.2                             |
| <b>SO5-4</b> | 20.24         | 62.94         | 20.61         | 0.36          | 32.45        | 54.91        | 46.49         | 10.55         | 27.31         | 0.38          | 1.208                             | 2.040                             | 1.8                             | 1.2                             | 1.1                             | 0.8                             | 1.5                             | 1.0                             | 3.9                             | 2.0                             |
| <b>SO6-1</b> | 10.07         | 48.05         | 12.95         | 0.21          | 35.62        | 42.22        | 32.47         | 7.23          | 23.86         | 0.35          | 1.209                             | 2.030                             | 0.8                             | 0.8                             | 0.8                             | 0.8                             | 0.8                             | 0.8                             | 2.1                             | 1.5                             |
| <b>SO6-2</b> | 12.70         | 47.45         | 14.71         | 0.60          | 27.41        | 41.18        | 34.42         | 6.98          | 24.13         | 0.34          | 1.197                             | 2.057                             | 1.4                             | 1.0                             | 1.0                             | 0.8                             | 1.3                             | 1.0                             | 7.7                             | 4.4                             |
| <b>SO6-3</b> | 15.51         | 50.78         | 26.18         | 0.50          | 28.58        | 38.52        | 46.85         | 10.67         | 28.86         | 0.52          | 1.217                             | 2.050                             | 1.6                             | 1.3                             | 1.0                             | 0.9                             | 2.1                             | 1.8                             | 6.2                             | 3.9                             |
| <b>SO6-4</b> | 15.80         | 53.17         | 22.52         | 0.60          | 28.87        | 43.24        | 42.65         | 10.87         | 28.41         | 0.57          | 1.208                             | 2.042                             | 1.6                             | 1.2                             | 1.1                             | 0.8                             | 1.8                             | 1.4                             | 7.3                             | 4.2                             |
| <b>SO4-1</b> | 25.91         | 76.89         | 19.59         | 0.34          | 28.72        | 47.41        | 38.47         | 8.53          | 21.83         | 0.40          | 1.190                             | 2.027                             | 2.6                             | 1.8                             | 1.6                             | 1.1                             | 1.6                             | 1.1                             | 4.2                             | 2.2                             |
| <b>SO4-2</b> | 17.98         | 58.44         | 21.44         | 0.16          | 28.82        | 53.22        | 52.43         | 10.90         | 26.34         | 0.38          | 1.195                             | 2.053                             | 1.8                             | 1.1                             | 1.2                             | 0.7                             | 1.7                             | 1.1                             | 1.9                             | 0.9                             |
| <b>SO4-3</b> | 17.14         | 53.07         | 20.73         | 0.14          | 28.91        | 59.96        | 62.65         | 10.86         | 26.23         | 0.46          | 1.196                             | 2.036                             | 1.7                             | 1.0                             | 1.1                             | 0.6                             | 1.7                             | 0.9                             | 1.6                             | 0.7                             |
| <b>SO4-4</b> | 19.36         | 53.42         | 22.40         | 0.16          | 34.00        | 58.64        | 30.21         | 11.58         | 29.12         | 0.48          | 1.203                             | 2.033                             | 1.7                             | 1.1                             | 0.9                             | 0.6                             | 1.5                             | 1.0                             | 1.6                             | 0.8                             |
| <b>SO3-1</b> | 11.57         | 45.09         | 11.83         | 0.22          | 20.85        | 40.20        | 36.12         | 5.37          | 15.01         | 0.35          | 1.190                             | 2.025                             | 1.6                             | 1.0                             | 1.3                             | 0.7                             | 1.3                             | 0.8                             | 3.6                             | 1.6                             |
| <b>SO3-2</b> | 11.34         | 51.80         | 12.92         | 0.17          | 30.56        | 43.56        | 37.21         | 6.94          | 18.46         | 0.53          | 1.197                             | 2.038                             | 1.1                             | 0.9                             | 1.0                             | 0.8                             | 1.0                             | 0.8                             | 2.0                             | 1.2                             |
| <b>SO3-3</b> | 12.91         | 59.38         | 14.37         | 0.15          | 30.32        | 38.73        | 33.39         | 6.79          | 20.99         | 0.57          | 1.200                             | 2.014                             | 1.2                             | 1.1                             | 1.1                             | 1.0                             | 1.1                             | 1.0                             | 1.8                             | 1.2                             |
| <b>SO3-4</b> | 12.82         | 56.62         | 14.42         | 0.18          | 27.89        | 45.30        | 30.11         | 7.26          | 20.32         | 0.74          | 1.204                             | 2.022                             | 1.3                             | 0.9                             | 1.2                             | 0.8                             | 1.2                             | 0.8                             | 2.2                             | 1.2                             |



**Table S8. Concentrations of measured metals in cryoconite samples, together with  $^{206}\text{Pb}/^{207}\text{Pb}$  and  $^{208}\text{Pb}/^{206}\text{Pb}$  ratios. The calculated anthropogenic metal enrichment factors (EF) results are also given after normalization for Fe and Al content ( $\text{Fe}_{\text{norm}}$  or  $\text{Al}_{\text{norm}}$ ).**

|           | <b>Pb</b><br>(mg/kg) | <b>Zn</b><br>(mg/kg) | <b>Cu</b><br>(mg/kg) | <b>Cd</b><br>(mg/kg) | <b>Fe</b><br>(g/kg) | <b>Al</b><br>(g/kg) | <b>Cr</b><br>(mg/kg) | <b>Co</b><br>(mg/kg) | <b>Ni</b><br>(mg/kg) | <b>Mn</b><br>(mg/kg) | $^{206}\text{Pb}/$<br>$^{207}\text{Pb}$ | $^{208}\text{Pb}/$<br>$^{206}\text{Pb}$ | <b>EF Pb</b><br>Fe norm | <b>EF Pb</b><br>Al norm | <b>EF Zn</b><br>Fe norm | <b>EF Zn</b><br>Al norm | <b>EF Cu</b><br>Fe norm | <b>EF Cu</b><br>Al norm | <b>EF Cd</b><br>Fe norm | <b>EF Cd</b><br>Al norm |
|-----------|----------------------|----------------------|----------------------|----------------------|---------------------|---------------------|----------------------|----------------------|----------------------|----------------------|-----------------------------------------|-----------------------------------------|-------------------------|-------------------------|-------------------------|-------------------------|-------------------------|-------------------------|-------------------------|-------------------------|
| <b>2</b>  | 82.79                | 85.07                | 34.3                 | 0.21                 | 49.62               | 83.03               | 83.01                | 13.39                | 37.19                | 0.34                 | 1.174                                   | 2.042                                   | 5.0                     | 3.3                     | 1.0                     | 0.7                     | 1.7                     | 1.1                     | 1.5                     | 0.7                     |
| <b>3</b>  | 23.04                | 96.89                | 22.4                 | 0.23                 | 42.56               | 75.50               | 77.22                | 13.16                | 35.89                | 0.51                 | 1.183                                   | 2.061                                   | 1.6                     | 1.0                     | 1.4                     | 0.9                     | 1.3                     | 0.8                     | 1.9                     | 0.9                     |
| <b>4</b>  | 95.53                | 92.36                | 34.8                 | 0.24                 | 37.08               | 69.40               | 75.57                | 13.01                | 36.70                | 0.30                 | 1.174                                   | 2.025                                   | 7.7                     | 4.6                     | 1.5                     | 0.9                     | 2.3                     | 1.3                     | 2.4                     | 1.1                     |
| <b>5</b>  | 40.91                | 74.22                | 27.5                 | 0.20                 | 42.75               | 77.55               | 64.01                | 13.73                | 29.15                | 0.39                 | 1.192                                   | 2.035                                   | 2.9                     | 1.8                     | 1.0                     | 0.6                     | 1.5                     | 0.9                     | 1.7                     | 0.8                     |
| <b>6</b>  | 36.84                | 87.32                | 33.4                 | 0.27                 | 51.27               | 89.73               | 80.95                | 17.74                | 34.71                | 0.63                 | 1.199                                   | 2.034                                   | 2.2                     | 1.4                     | 1.0                     | 0.6                     | 1.6                     | 1.0                     | 1.9                     | 0.9                     |
| <b>7</b>  | 24.02                | 59.57                | 25.8                 | 0.24                 | 29.38               | 63.57               | 47.55                | 11.42                | 22.56                | 0.40                 | 1.197                                   | 2.036                                   | 2.5                     | 1.3                     | 1.2                     | 0.6                     | 2.1                     | 1.1                     | 2.9                     | 1.1                     |
| <b>8</b>  | 20.48                | 86.64                | 22.2                 | 0.25                 | 41.37               | 90.20               | 72.99                | 13.05                | 28.99                | 0.45                 | 1.197                                   | 2.048                                   | 1.5                     | 0.8                     | 1.3                     | 0.6                     | 1.3                     | 0.7                     | 2.2                     | 0.8                     |
| <b>9</b>  | 57.91                | 90.04                | 40.1                 | 0.21                 | 41.38               | 91.87               | 83.22                | 15.21                | 36.70                | 0.51                 | 1.181                                   | 2.039                                   | 4.2                     | 2.1                     | 1.3                     | 0.7                     | 2.3                     | 1.2                     | 1.8                     | 0.7                     |
| <b>10</b> | 45.57                | 83.26                | 34.4                 | 0.19                 | 46.65               | 79.24               | 81.29                | 14.15                | 33.73                | 0.25                 | 1.184                                   | 2.039                                   | 2.9                     | 1.9                     | 1.1                     | 0.7                     | 1.8                     | 1.2                     | 1.4                     | 0.7                     |
| <b>11</b> | 97.28                | 97.55                | 39.6                 | 0.60                 | 48.16               | 78.80               | 84.04                | 15.31                | 41.80                | 0.31                 | 1.180                                   | 2.038                                   | 6.1                     | 4.1                     | 1.2                     | 0.8                     | 2.0                     | 1.3                     | 4.5                     | 2.3                     |
| <b>12</b> | 97.70                | 86.80                | 34.3                 | 0.19                 | 37.93               | 65.72               | 76.42                | 12.95                | 36.46                | 0.31                 | 1.169                                   | 2.032                                   | 7.7                     | 5.0                     | 1.4                     | 0.9                     | 2.2                     | 1.4                     | 1.8                     | 0.9                     |
| <b>13</b> | 19.87                | 88.14                | 21.5                 | 0.26                 | 40.18               | 85.90               | 65.98                | 13.00                | 35.83                | 0.46                 | 1.194                                   | 2.047                                   | 1.5                     | 0.8                     | 1.3                     | 0.7                     | 1.3                     | 0.7                     | 2.3                     | 0.9                     |



**Table S9. The Pearson's correlation matrix for cryoconite samples. Different heavy metals concentrations, <sup>206</sup>Pb/<sup>207</sup>Pb and <sup>208</sup>Pb/<sup>206</sup>Pb isotopic ratios, natural and anthropogenic radionuclide activity concentrations, organic matter content (LOI), and some cryoconite characteristics: localization altitude, area and depth were taken into account.**

| Cryoconites           | <sup>234</sup> U | <sup>238</sup> U | <sup>230</sup> Th | <sup>232</sup> Th | Cr   | Pb    | Cu          | Zn          | Cd    | Co          | Ni          | Mn           | Fe          | Al          | <sup>206/207</sup> Pb | <sup>208/206</sup> Pb | LOI         | <sup>137</sup> Cs | <sup>239+240</sup> Pu | <sup>241</sup> Am | <sup>238</sup> Pu | Altitude     | Area        | Depth        |      |
|-----------------------|------------------|------------------|-------------------|-------------------|------|-------|-------------|-------------|-------|-------------|-------------|--------------|-------------|-------------|-----------------------|-----------------------|-------------|-------------------|-----------------------|-------------------|-------------------|--------------|-------------|--------------|------|
| <sup>210</sup> Pb     | 0.56             | <b>0.72</b>      | <b>0.59</b>       | -0.06             | 0.21 | 0.50  | 0.08        | 0.53        | 0.15  | -0.29       | 0.41        | -0.41        | -0.18       | -0.34       | -0.55                 | -0.19                 | <b>0.77</b> | <b>0.80</b>       | <b>0.72</b>           | <b>0.70</b>       | <b>0.75</b>       | <b>0.64</b>  | 0.38        | <b>0.68</b>  |      |
| <sup>234</sup> U      |                  | <b>0.94</b>      | <b>0.96</b>       | 0.25              | 0.19 | 0.13  | -0.22       | 0.57        | -0.12 | -0.32       | 0.40        | -0.02        | -0.19       | -0.40       | -0.44                 | 0.31                  | <b>0.60</b> | <b>0.77</b>       | <b>0.72</b>           | <b>0.70</b>       | <b>0.67</b>       | <b>0.72</b>  | 0.43        | 0.24         |      |
| <sup>238</sup> U      |                  |                  | <b>0.92</b>       | 0.26              | 0.19 | 0.20  | -0.18       | <b>0.60</b> | -0.03 | -0.34       | 0.41        | -0.16        | -0.18       | -0.36       | -0.46                 | 0.22                  | <b>0.64</b> | <b>0.79</b>       | <b>0.72</b>           | <b>0.70</b>       | <b>0.68</b>       | <b>0.73</b>  | 0.47        | 0.41         |      |
| <sup>230</sup> Th     |                  |                  |                   | 0.36              | 0.18 | 0.16  | -0.19       | <b>0.58</b> | 0.03  | -0.22       | 0.42        | -0.05        | -0.15       | -0.44       | -0.39                 | 0.21                  | 0.53        | <b>0.74</b>       | <b>0.66</b>           | <b>0.63</b>       | <b>0.62</b>       | <b>0.73</b>  | 0.32        | 0.17         |      |
| <sup>232</sup> Th     |                  |                  |                   |                   | 0.13 | -0.23 | 0.04        | 0.27        | 0.09  | 0.44        | 0.05        | 0.27         | 0.06        | 0.25        | 0.27                  | -0.03                 | -0.02       | -0.12             | -0.19                 | -0.15             | -0.17             | -0.05        | 0.07        | <b>-0.58</b> |      |
| Cr                    |                  |                  |                   |                   |      | 0.52  | <b>0.65</b> | <b>0.81</b> | 0.22  | <b>0.62</b> | <b>0.90</b> | -0.03        | <b>0.77</b> | <b>0.53</b> | -0.55                 | 0.03                  | 0.22        | 0.05              | 0.04                  | -0.01             | 0.02              | -0.22        | -0.03       | 0.20         |      |
| Pb                    |                  |                  |                   |                   |      |       | <b>0.78</b> | 0.36        | 0.32  | 0.12        | <b>0.67</b> | <b>-0.58</b> | 0.16        | -0.11       | <b>-0.86</b>          | <b>-0.58</b>          | 0.40        | 0.35              | 0.27                  | 0.23              | 0.35              | 0.09         | -0.17       | 0.44         |      |
| Cu                    |                  |                  |                   |                   |      |       |             | 0.28        | 0.30  | 0.51        | <b>0.62</b> | -0.30        | 0.34        | 0.30        | <b>-0.59</b>          | <b>-0.59</b>          | 0.04        | -0.15             | -0.20                 | -0.21             | -0.12             | -0.43        | -0.26       | 0.06         |      |
| Zn                    |                  |                  |                   |                   |      |       |             |             | 0.38  | 0.39        | <b>0.86</b> | 0.09         | 0.51        | 0.30        | -0.44                 | 0.26                  | 0.49        | 0.40              | 0.36                  | 0.30              | 0.30              | 0.25         | 0.20        | 0.25         |      |
| Cd                    |                  |                  |                   |                   |      |       |             |             |       | 0.29        | 0.42        | -0.12        | 0.27        | 0.06        | -0.03                 | -0.02                 | 0.10        | -0.05             | -0.09                 | -0.15             | -0.15             | 0.06         | -0.17       | 0.09         |      |
| Co                    |                  |                  |                   |                   |      |       |             |             |       |             | 0.41        | 0.42         | <b>0.74</b> | <b>0.78</b> | 0.14                  | -0.15                 | -0.36       | -0.49             | -0.52                 | -0.53             | -0.49             | -0.56        | -0.41       | -0.37        |      |
| Ni                    |                  |                  |                   |                   |      |       |             |             |       |             |             | -0.12        | <b>0.59</b> | 0.20        | <b>-0.69</b>          | -0.01                 | 0.37        | 0.31              | 0.27                  | 0.21              | 0.23              | 0.08         | 0.05        | 0.33         |      |
| Mn                    |                  |                  |                   |                   |      |       |             |             |       |             |             |              | 0.1         | 0.44        | <b>0.59</b>           | 0.37                  | -0.41       | -0.25             | -0.22                 | -0.20             | -0.28             | -0.12        | -0.02       | -0.39        |      |
| Fe                    |                  |                  |                   |                   |      |       |             |             |       |             |             |              |             | <b>0.67</b> | -0.05                 | 0.14                  | -0.21       | -0.29             | -0.24                 | -0.28             | -0.30             | -0.38        | -0.16       | 0.07         |      |
| Al                    |                  |                  |                   |                   |      |       |             |             |       |             |             |              |             |             | 0.24                  | 0.13                  | -0.32       | -0.51             | -0.55                 | -0.55             | -0.54             | <b>-0.64</b> | -0.23       | -0.21        |      |
| <sup>206/207</sup> Pb |                  |                  |                   |                   |      |       |             |             |       |             |             |              |             |             |                       | 0.24                  | -0.50       | -0.48             | -0.42                 | -0.37             | -0.46             | -0.17        | 0.01        | -0.53        |      |
| <sup>208/206</sup> Pb |                  |                  |                   |                   |      |       |             |             |       |             |             |              |             |             |                       |                       | -0.03       | -0.06             | -0.01                 | -0.05             | -0.16             | 0.07         | 0.11        | -0.11        |      |
| LOI                   |                  |                  |                   |                   |      |       |             |             |       |             |             |              |             |             |                       |                       |             | <b>0.82</b>       | <b>0.81</b>           | <b>0.79</b>       | <b>0.83</b>       | <b>0.67</b>  | <b>0.60</b> | 0.40         |      |
| <sup>137</sup> Cs     |                  |                  |                   |                   |      |       |             |             |       |             |             |              |             |             |                       |                       |             |                   | <b>0.98</b>           | <b>0.98</b>       | <b>0.98</b>       | <b>0.98</b>  | <b>0.91</b> | <b>0.58</b>  | 0.57 |
| <sup>239+240</sup> Pu |                  |                  |                   |                   |      |       |             |             |       |             |             |              |             |             |                       |                       |             |                   |                       | <b>0.99</b>       | <b>0.98</b>       | <b>0.90</b>  | <b>0.69</b> | <b>0.60</b>  | 0.57 |
| <sup>241</sup> Am     |                  |                  |                   |                   |      |       |             |             |       |             |             |              |             |             |                       |                       |             |                   |                       |                   | <b>0.98</b>       | <b>0.90</b>  | <b>0.73</b> | 0.57         | 0.57 |
| <sup>238</sup> Pu     |                  |                  |                   |                   |      |       |             |             |       |             |             |              |             |             |                       |                       |             |                   |                       |                   |                   | <b>0.87</b>  | <b>0.63</b> | <b>0.58</b>  | 0.40 |
| Altitude              |                  |                  |                   |                   |      |       |             |             |       |             |             |              |             |             |                       |                       |             |                   |                       |                   |                   |              | 0.57        | 0.40         | 0.40 |
| Area                  |                  |                  |                   |                   |      |       |             |             |       |             |             |              |             |             |                       |                       |             |                   |                       |                   |                   |              |             |              | 0.37 |

**Table S10. Results (H, p values) of Kruskal-Wallis test showing differences in heavy metals concentrations and radionuclide activity concentrations between cryoconites and soils. Statistically significant differences are bolded.**

|          | <sup>210</sup> Pb | <sup>137</sup> Cs | <sup>239+240</sup> Pu | <sup>241</sup> Am | <sup>234</sup> U | <sup>238</sup> U | <sup>230</sup> Th | <sup>232</sup> Th | Cr         | Pb         | Cu         | Zn         | Cd  | Co         | Ni         | Mn         | Fe         | Al         | <sup>206/207</sup> Pb | <sup>208/207</sup> Pb | LOI |
|----------|-------------------|-------------------|-----------------------|-------------------|------------------|------------------|-------------------|-------------------|------------|------------|------------|------------|-----|------------|------------|------------|------------|------------|-----------------------|-----------------------|-----|
| <b>H</b> | 22.2              | 8.0               | 6.3                   | 9.3               | 4.7              | 4.6              | 20.7              | 16.4              | 19.8       | 18.5       | 13.7       | 19.2       | 2.0 | 19.8       | 11.3       | 5.2        | 12.9       | 21.9       | 14.9                  | 0.4                   | 3.2 |
| <b>p</b> | <b>.00</b>        | <b>.00</b>        | <b>.01</b>            | <b>.00</b>        | <b>.03</b>       | <b>.03</b>       | <b>.00</b>        | <b>.00</b>        | <b>.00</b> | <b>.00</b> | <b>.00</b> | <b>.00</b> | .16 | <b>.00</b> | <b>.00</b> | <b>.02</b> | <b>.00</b> | <b>.00</b> | <b>.00</b>            | <b>.05</b>            | .07 |
